# Supplementary material for: Quantitative Real-Time PCR Assay for the Detection of Pectobacterium parmentieri, a Causal Agent of Potato Soft Rot
Source: MDPI journal article supplement (doi:10.3390/plants10091880), 2021-09-10
Supplement: s1 [file s1]

**Supplementary Table S1. Selectivity of the designed qPCR method**

PCR methods used to verify the taxonomy of the isolates were the following: *Pectobacterium carotovorum* subsp. *carotovorum* (Pca) - [1], *Pectobacterium atrosepticum* (Pat) - [2], *Pectobacterium brasiliense* (Pbr) - [3], *Pectobacterium parmentieri* (former *P.wasabiae*) - [4], *Dickeya solani* (Dso) –[5], *Dickeya dianthicola* (Ddi) - [6]. These methods do not discriminate between *P.carotovorum* (Pca) and *P. versatile* (Pve) [7], and between *P.wasabiae* (Pwa) and *P. parmentieri* (Ppa). Therefore, the isolates characterized by PCR only are regarded as double designation.

| No | Strain designation | Alternative strain designation | Geographical region | Species | Genus/species determination | Assay    | Cq    |
|----|--------------------|--------------------------------|---------------------|---------|-----------------------------|----------|-------|
| 1  | F127               | B5                             | Kaluga              | Ppa     | 16S, PCR, MLST              | positive | 20.01 |
| 2  | F148               | PB20                           | Moscow              | Ppa     | NZ_PDDJ00000000.1           | positive | 21.34 |
| 3  | F149               | PB21                           | Moscow              | Ppa     | 16S, PCR                    | positive | 19.81 |
| 4  | F174               | 536 / I3                       | Moscow              | Ppa     | PCR                         | Positive | 22.31 |
| 5  | F177               |                                |                     | Ppa     |                             | Positive | 20.99 |
| 6  | F034               | B9                             | Kaluga              | Ppa     | 16S, PCR                    | positive | 18.10 |
| 7  | F035               | B7                             | Kaluga              | Pwa/Ppa | PCR                         | positive | 21.56 |
| 8  | F178               |                                |                     | Ppa/Pwa |                             | negative | -     |
| -9 | F007               | 2892                           | VKPM                | Pwa     | 16S, PCR, MLST              | negative | -     |
| 10 | F164               | PB31                           | Moscow              | Paq     | NZ_PJJA00000000.1           | negative | -     |
| 11 | F004               | PB72                           | Moscow              | Pat     | NZ_PDDK00000000.1           | negative | -     |
| 12 | F041               |                                | Moscow              | Pat     | 16S, PCR, MLST              | negative | -     |
| 13 | F048               | 14                             | Moscow              | Pat     | 16S, PCR, MLST              | negative | -     |
| 14 | F162               | SCRI1043                       | Scotland            | Pat     | NC_004547                   | negative | -     |
| 15 | F163               | 21A                            | Belarus             | Pat     | NZ_CP009125                 | negative | -     |
| 16 | F126               |                                | Samara              | Pbr     | NZ_RRYQ00000000.1           | negative | -     |
| 17 | F128               |                                | Samara              | Pbr     | 16S, PCR                    | negative | -     |

|    |      |          |           |         |                   |          |   |
|----|------|----------|-----------|---------|-------------------|----------|---|
| 18 | F152 | PB29     | Moscow    | Pbr     |                   | negative | - |
| 19 | F157 | PB38     | Moscow    | Pbr     | NZ_PJDL00000000.1 | negative | - |
| 20 | F053 | B6       | Unknown   | Pca     | 16S, PCR          | negative | - |
| 21 | F118 | 522 / G2 | Moscow    | Pca     | 16S, PCR          | negative | - |
| 22 | F160 | NCPFB312 | Denmark   | Pca     | NZ_JQHJ00000000.1 | negative | - |
| 23 | F057 |          |           | Pca     |                   | negative | - |
| 24 | F110 |          |           | Pca     |                   | negative | - |
| 25 | F015 | D6       | Moscow    | Pca/Pve | PCR               | negative | - |
| 26 | F017 | 246 / I7 | Moscow    | Pca/Pve | PCR               | negative | - |
| 27 | F022 | 2.4 / F1 | Tomsk     | Pca/Pve | PCR               | negative | - |
| 28 | F024 | A7       | Lithuania | Pca/Pve | PCR               | negative | - |
| 29 | F025 | B9       | Moscow    | Pca/Pve | PCR               | negative | - |
| 30 | F027 | D1       | Moscow    | Pca/Pve | PCR               | negative | - |
| 31 | F047 | 10b      | Moscow    | Pca/Pve | PCR               | negative | - |
| 32 | F050 | 10a      | Moscow    | Pca/Pve | PCR               | negative | - |
| 33 | F061 | 35 / F8  | Ethiopia  | Pca/Pve | PCR               | negative | - |
| 34 | F062 | 246 / I8 | Moscow    | Pca/Pve | PCR               | negative | - |
| 35 | F063 | D3       | Unknown   | Pca/Pve | PCR               | negative | - |
| 36 | F064 | 520 / F6 | Moscow    | Pca/Pve | PCR               | negative | - |
| 37 | F073 | 5        | Unknown   | Pca/Pve | PCR               | negative | - |
| 38 | F077 | B6       | Ethiopia  | Pca/Pve | PCR               | negative | - |
| 39 | F092 | E2       | Moscow    | Pca/Pve | PCR               | negative | - |
| 40 | F099 | 518 / E8 | Moscow    | Pca/Pve | PCR               | negative | - |

---

|    |      |           |          |         |                     |          |   |
|----|------|-----------|----------|---------|---------------------|----------|---|
| 41 | F111 | 301 / I8  | Moscow   | Pca/Pve | PCR                 | negative | - |
| 42 | F121 | C8        | Moscow   | Pca/Pve | PCR                 | negative | - |
| 43 | F124 | 2019.14   | Tver     | Pca/Pve | PCR                 | negative | - |
| 44 | F133 | C1        | Tyumen   | Pca/Pve | PCR                 | negative | - |
| 45 | F136 |           | Bryansk  | Pca/Pve | PCR                 | negative | - |
| 46 | F051 |           |          | Pca/Pve | PCR                 | negative | - |
| 47 | F067 |           |          | Pca/Pve | PCR                 | negative | - |
| 48 | F108 |           |          | Pca/Pve | PCR                 | negative | - |
| 49 | F002 | PB69      | Moscow   | Pve     | NZ_PDVY00000000.1   | negative | - |
| 50 | F003 | PB70      | Moscow   | Pve     | NZ_PDVZ00000000.1   | negative | - |
| 51 | F016 |           | Ryazan   | Pve     | NZ_RRYR00000000.1   | negative | - |
| 52 | F018 |           | Moscow   | Pve     | NZ_PDVV00000000.1   | negative | - |
| 53 | F020 | 523 / I6  | Moscow   | Pve     | 16S, PCR            | negative | - |
| 54 | F021 | 526 / I4  | Moscow   | Pve     | 16S, PCR            | negative | - |
| 55 | F040 | 524 / H4  | Moscow   | Pve     | 16S, PCR            | negative | - |
| 56 | F131 | 12a       | VIZR     | Pve     | NZ_PD VW00000000.1  | negative | - |
| 57 | F135 | 2.1 / F5  | Moscow   | Pve     | NZ_PD V X00000000.1 | negative | - |
| 58 | F109 | 35 / E6   | Ethiopia | Ppo     | NZ_RRYS00000000.1   | negative | - |
| 59 | F171 | 2019.19-4 | Moscow   | Ppo     | 16S, MLST           | negative | - |
| 60 | F014 | B1        | Tula     | Ddi     | PCR                 | negative | - |
| 61 | F056 | A4        | Moscow   | Ddi     | PCR                 | negative | - |
| 62 | F071 | C3        | Moscow   | Ddi     | PCR                 | ?        | - |
| 63 | F072 | B6        | Moscow   | Ddi     | PCR                 | negative | - |

|    |      |           |           |                               |                |          |   |
|----|------|-----------|-----------|-------------------------------|----------------|----------|---|
| 64 | F090 | 18b       | Kaluga    | Ddi                           | 16S, MLST      | negative | - |
| 65 | F097 | 1913 / H9 | Moscow    | Ddi                           | PCR            | negative | - |
| 66 | F117 | C9        | Bryansk   | Ddi                           | PCR            | negative | - |
| 67 | F119 | F8        | Moscow    | Ddi                           | PCR            | negative | - |
| 68 | F120 | C7        | Samara    | Ddi                           | PCR            | negative | - |
| 69 | F032 |           |           | Ddi                           |                | negative | - |
| 70 | F101 |           |           | Ddi                           | PCR            | negative | - |
| 71 | F116 |           |           | Ddi                           |                | negative | - |
| 72 | F012 | Dfil      | Voronezh  | Dso                           | NZ_PGOJ00000.1 | negative | - |
| 73 | F043 |           |           | Dso                           | PCR            | negative | - |
| 74 | F102 |           |           | Dso                           | PCR            | negative | - |
| 75 | F155 |           |           | Dso                           | PCR            | negative | - |
| 76 | F082 | H4        | Moscow    | Dickeya sp.                   | 16S, PCR       | negative | - |
| 77 | F096 | F9        | Samara    | Dickeya sp.                   | 16S, PCR       | negative | - |
| 78 | F019 | I9        | Moscow    | Advenella sp.                 | 16S            | negative | - |
| 79 | F023 | A1        | Moscow    | Advenella sp.                 | 16S            | negative | - |
| 80 | F113 |           | Unknown   | Agrobacterium tumefaciens     | 16S            | negative | - |
| 81 | F009 | 2220      | Moscow    | Clavibacter michiganensis     | 16S            | negative | - |
| 82 | F010 | 2222      | Unknown   | Clavibacter michiganensis     | 16S            | negative | - |
| 83 | F091 |           | Lithuania | Curtobacterium flaccumfaciens | 16S            | negative | - |

---

|     |      |          |           |                                        |     |          |   |
|-----|------|----------|-----------|----------------------------------------|-----|----------|---|
| 84  | F094 |          | Ethiopia  | <i>Curtobacterium</i><br>sp.           | 16S | negative | - |
| 85  | F033 | 245/G8   | Moscow    | <i>Morganella</i> sp.                  | 16S | negative | - |
| 86  | F074 |          | Unknown   | <i>Morganella</i> sp.                  | 16S | negative | - |
| 87  | F039 | A8       | Lithuania | <i>Pseudomonas</i> sp.                 | 16S | negative | - |
| 88  | F052 |          | Moscow    | <i>Pseudomonas</i> sp.                 | 16S | negative | - |
| 89  | F054 | E4       | Moscow    | <i>Pseudomonas</i> sp.                 | 16S | negative | - |
| 90  | F080 | C7       | Unknown   | <i>Pseudomonas</i> sp.                 | 16S | negative | - |
| 91  | F093 |          | Lithuania | <i>Pseudomonas</i> sp.                 | 16S | negative | - |
| 92  | F114 |          | Unknown   | <i>Pseudomonas</i> sp.                 | 16S | negative | - |
| 93  | F115 | 1861a    | Belgorod  | <i>Pseudomonas</i> sp.                 | 16S | negative | - |
| 94  | F123 |          | Moscow    | <i>Pseudomonas</i> sp.                 | 16S | negative | - |
| 95  | F125 |          | Unknown   | <i>Pseudomonas</i> sp.                 | 16S | negative | - |
| 96  | F065 | 442 / H8 | Moscow    | <i>Serratia</i> sp.                    | 16S | negative | - |
| 97  | F059 | 2354     | Unknown   | <i>Stenotrophomonas</i><br>maltophilia | 16S | negative | - |
| 98  | F036 |          | Unknown   | <i>Stenotrophomonas</i><br>sp.         | 16S | negative | - |
| 99  | F037 | 20/I3    | Moscow    | <i>Stenotrophomonas</i><br>sp.         | 16S | negative | - |
| 100 | F038 | 1808v    | Novgorod  | <i>Stenotrophomonas</i><br>sp.         | 16S | negative | - |
| 101 | F045 | A3       | Krasnodar | <i>Stenotrophomonas</i><br>sp.         | 16S | negative | - |
| 102 | F055 |          | Moscow    | <i>Stenotrophomonas</i><br>sp.         | 16S | negative | - |
| 103 | F060 |          | Ethiopia  | <i>Stenotrophomonas</i><br>sp.         | 16S | negative | - |

---

|     |      |       |          |                         |     |          |   |
|-----|------|-------|----------|-------------------------|-----|----------|---|
| 104 | F066 |       | Samara   | Stenotrophomonas<br>sp. | 16S | negative | - |
| 105 | F079 | 1860b | Voronezh | Stenotrophomonas<br>sp. | 16S | negative | - |
| 106 | F013 | DD    | Moscow   | Xanthomonas sp.         | 16S | negative | - |
| 107 | F028 |       | Moscow   | Xanthomonas sp.         | 16S | negative | - |
| 108 | F030 |       | Moscow   | Xanthomonas sp.         | 16S | negative | - |
| 109 | F076 | C3    | Moscow   | Xanthomonas sp.         | 16S | negative | - |

## References

1. Kang, H. W.; Kwon, S. W.; Go, S. J. PCR-based specific and sensitive detection of *Pectobacterium carotovorum* ssp. *carotovorum* by primers generated from a URP-PCR fingerprinting-derived polymorphic band. *Plant Pathology* **2003**, *52*, 127–133, doi:10.1046/j.1365-3059.2003.00822.x.
2. De Boer, S. H.; Ward, L. J. PCR detection of *Erwinia carotovora* subsp. *atroseptica* associated with potato tissue. *Phytopathology* **1995**, *85*, 854–858, doi:10.1094/Phyto-85-854.
3. Duarte, V.; De Boer, S. H.; Ward, L. J.; De Oliveira, A. M. R. Characterization of atypical *Erwinia carotovora* strains causing blackleg of potato in Brazil. *Journal of Applied Microbiology* **2004**, *96*, 535–545, doi:10.1111/j.1365-2672.2004.02173.x.
4. De Boer, S. H.; Li, X.; Ward, L. J. *Pectobacterium* spp. Associated with Bacterial Stem Rot Syndrome of Potato in Canada. *Phytopathology* **2012**, *102*, 937–947, doi:10.1094/PHYTO-04-12-0083-R.
5. van Vaerenbergh, J.; Baeyen, S.; de Vos, P.; Maes, M. Sequence diversity in the *Dickeya* *flic* gene: Phylogeny of the *Dickeya* genus and taqman® PCR for “*D. solani*”, new biovar 3 variant on potato in Europe. *PLoS ONE* **2012**, *7*, doi:10.1371/journal.pone.0035738.
6. Pritchard, L.; Humphris, S.; Saddler, G. S.; Parkinson, N. M.; Bertrand, V.; Elphinstone, J. G.; Toth, I. K. Detection of phytopathogens of the genus *Dickeya* using a PCR primer prediction pipeline for draft bacterial genome sequences. *Plant Pathology* **2013**, *62*, 587–596, doi:10.1111/j.1365-3059.2012.02678.x.
7. Portier, P.; Pédrón, J.; Taghouti, G.; Fischer-Le Saux, M.; Caullireau, E.; Bertrand, C.; Laurent, A.; Chawki, K.; Oulgazi, S.; Moumni, M.; Andrivon, D.; Dutrieux, C.; Faure, D.; Hélias, V.; Barny, M.-A. Elevation of *Pectobacterium carotovorum* subsp. *odoriferum* to species level as *Pectobacterium odoriferum* sp. nov., proposal of *Pectobacterium brasiliense* sp. nov. and *Pectobacterium actinidiae* sp. nov., emended description of *Pectobacterium carotovorum* and description of *Pectobacterium versatile* sp. nov., isolated from streams and symptoms on diverse plants. *International journal of systematic and evolutionary microbiology* **2019**, doi:10.1099/ijsem.0.003611.
